# Supplementary material for: Targeting Dopamine Receptor D2 by Imipridone Suppresses Uterine Serous Cancer Malignant Phenotype
Source: MDPI journal article supplement (doi:10.3390/cancers12092436), 2020-08-27
Supplement: s1 [file s1]

## Supplementary Figure 1.

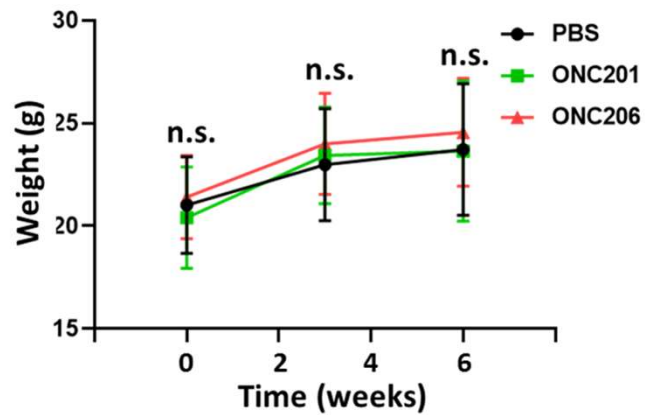

**Figure S1. Effect of ONC201 and ONC206 on body weight of C57BL/6 mice.** No significant difference in body weight was observed in mice treated with 100 mg/kg ONC201 or ONC206 twice per week for 6 weeks compared with the control phosphate-buffered saline (PBS) group. n. s.=not significant ( $p>0.05$ ).

## Supplementary Figure 2.

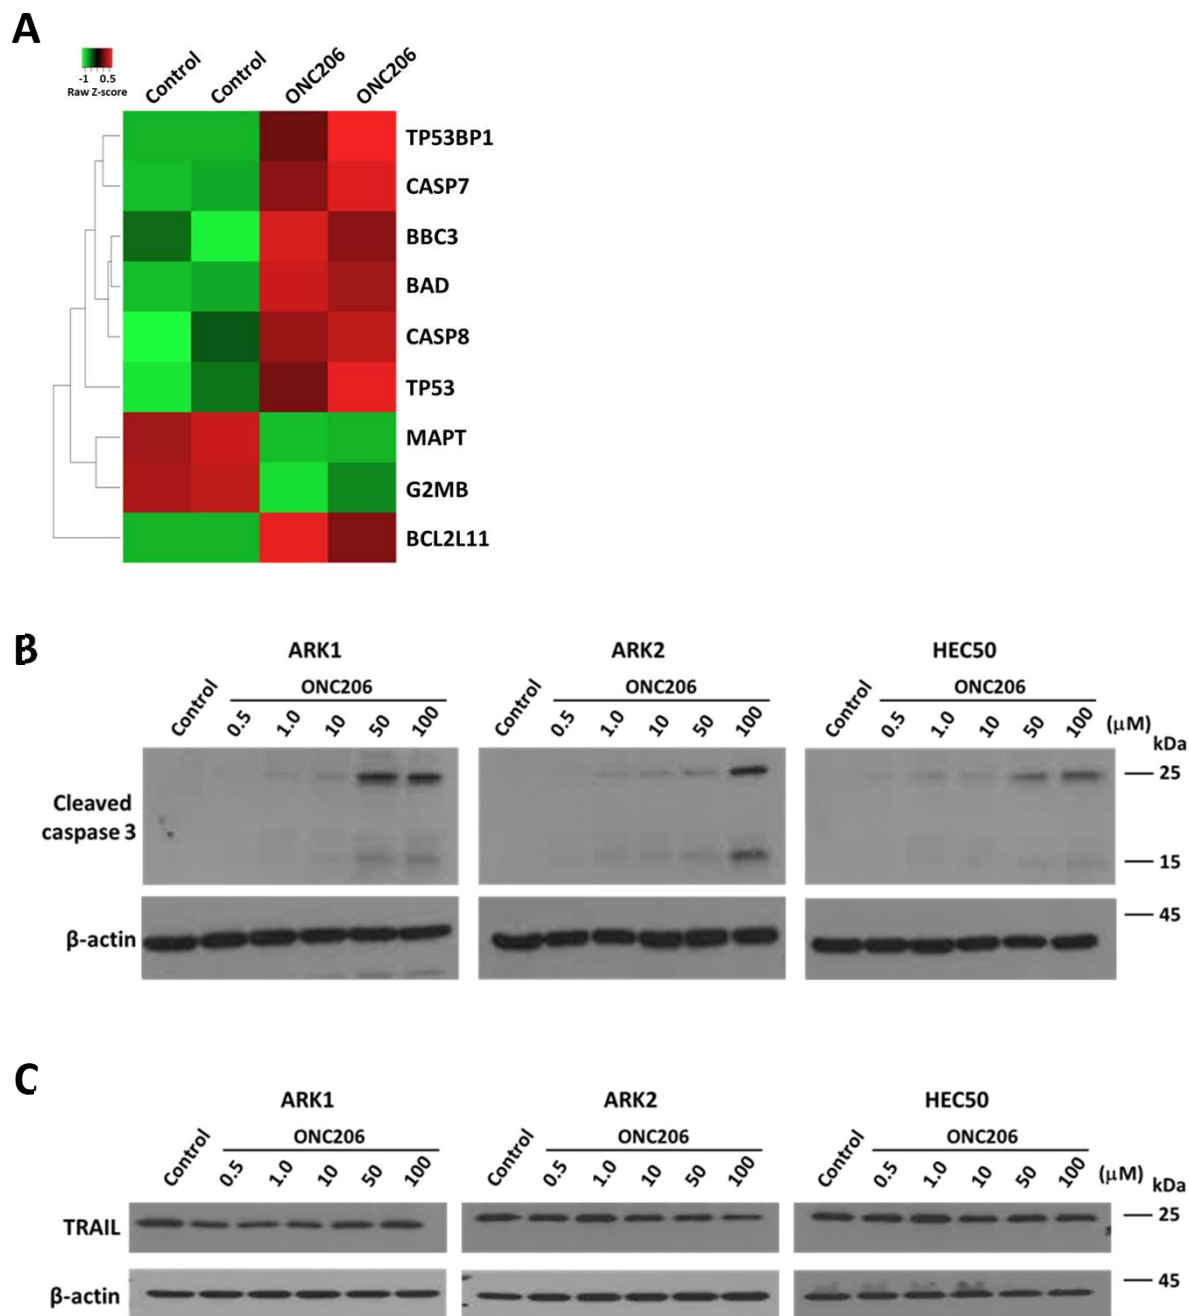

**Figure S2. Effect of ONC206 on pro-apoptotic protein expression.** (A) Heat map obtained using reverse phase protein array analysis shows differentially expressed proteins related to apoptosis in ARK1 cells with (n=2) or without (n=2) 48 hours of treatment with 50μM ONC206. (B) and (C) Western blot analyses show (B) increased cleaved caspase 3 protein level and (C) no significant change in TRAIL protein level in ONC206-treated ARK1, ARK2, and HEC50 cells compared with control cells without treatment. β-actin served as a loading control. Three independent experiments were performed.

### Supplementary Figure 3.

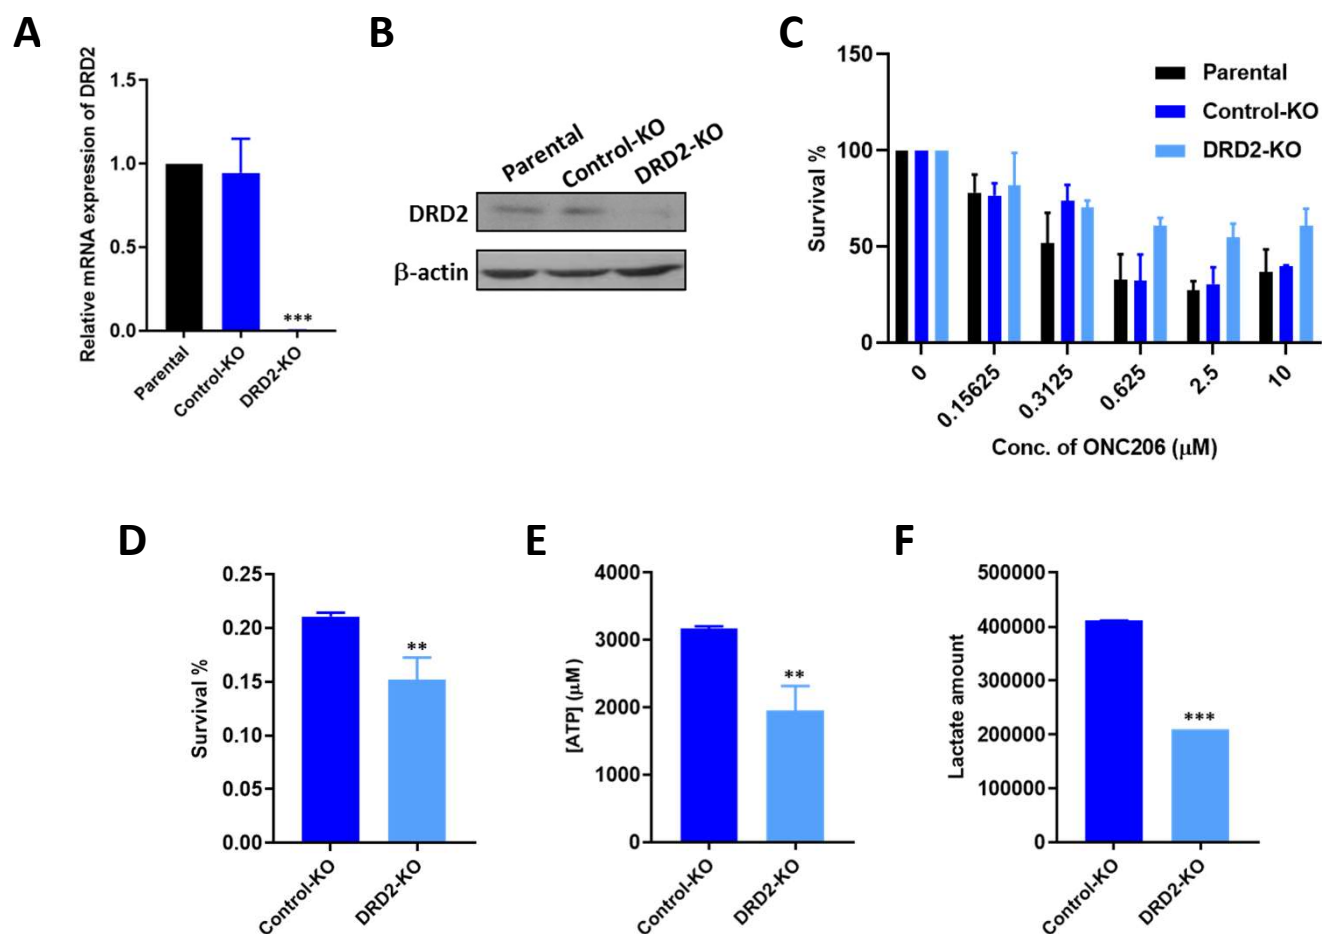

**Figure S3. Role of DRD2 in mediating the suppressive effect of ONC206 in USC cells.** (A) Quantitative reverse transcription PCR and (B) Western blot analyses showed that DRD2 was successfully knocked out in ARK2 cells. β-actin served as a loading control. Parental; Parental ARK2 cells. (C) No significant difference in cell viability was observed between parental ARK2 cells and Control-knockout (KO) ARK2 cells, whereas DRD2-KO cells were more resistant to ONC206 than Control-KO or parental ARK2 cells (Parental). Three independent experiments were performed (mean ± standard deviation). (D-F) Decrease in (D) cell viability, (E) ATP production, and (F) lactate secretion in DRD2-KO cells compared with Control-KO cells. Results were averaged from three independent experiments and are shown as mean ± standard deviation. \*\*\*p<0.001, \*\*p<0.01, two-tailed Student t test.

# Supplementary Figure 4.

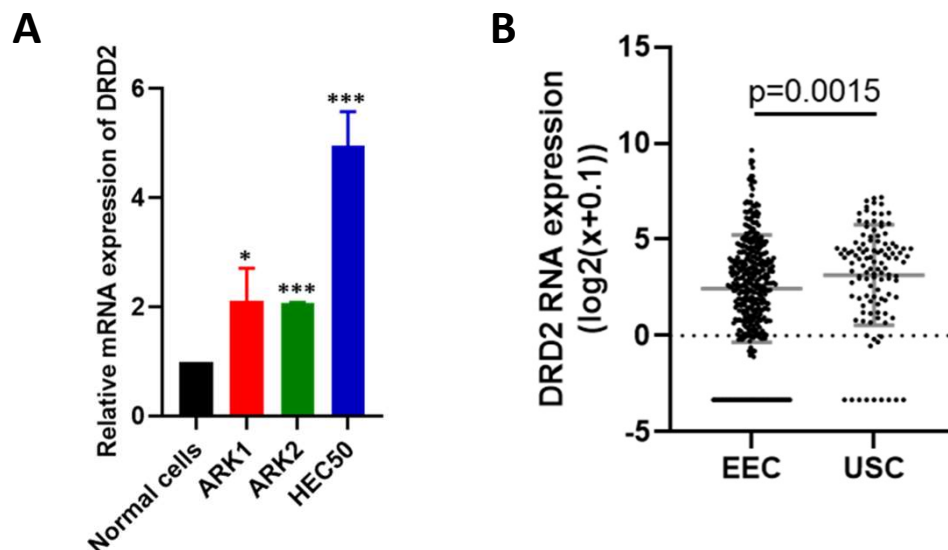

**Figure S4. DRD2 RNA expression in different endometrial cell lines and tissues.** (A) DRD2 mRNA level is overexpressed in uterine serous cancer (USC) cell lines compared to normal endometrial cells as measured by quantitative reverse transcription PCR analysis. Results were averaged from three independent experiments and are shown as mean  $\pm$  standard deviation. \*\*\* $p < 0.001$ , \* $p < 0.05$ , two-tailed Student t test. (B) TCGA RNA-seq data shows that DRD2 RNA expression is significantly higher in USC than in endometrioid endometrial cancer (EEC). EEC,  $n=409$ ; USC,  $n=114$ .  $p=0.0015$ , Mann-Whitney U test.

### Supplementary Figure 5.

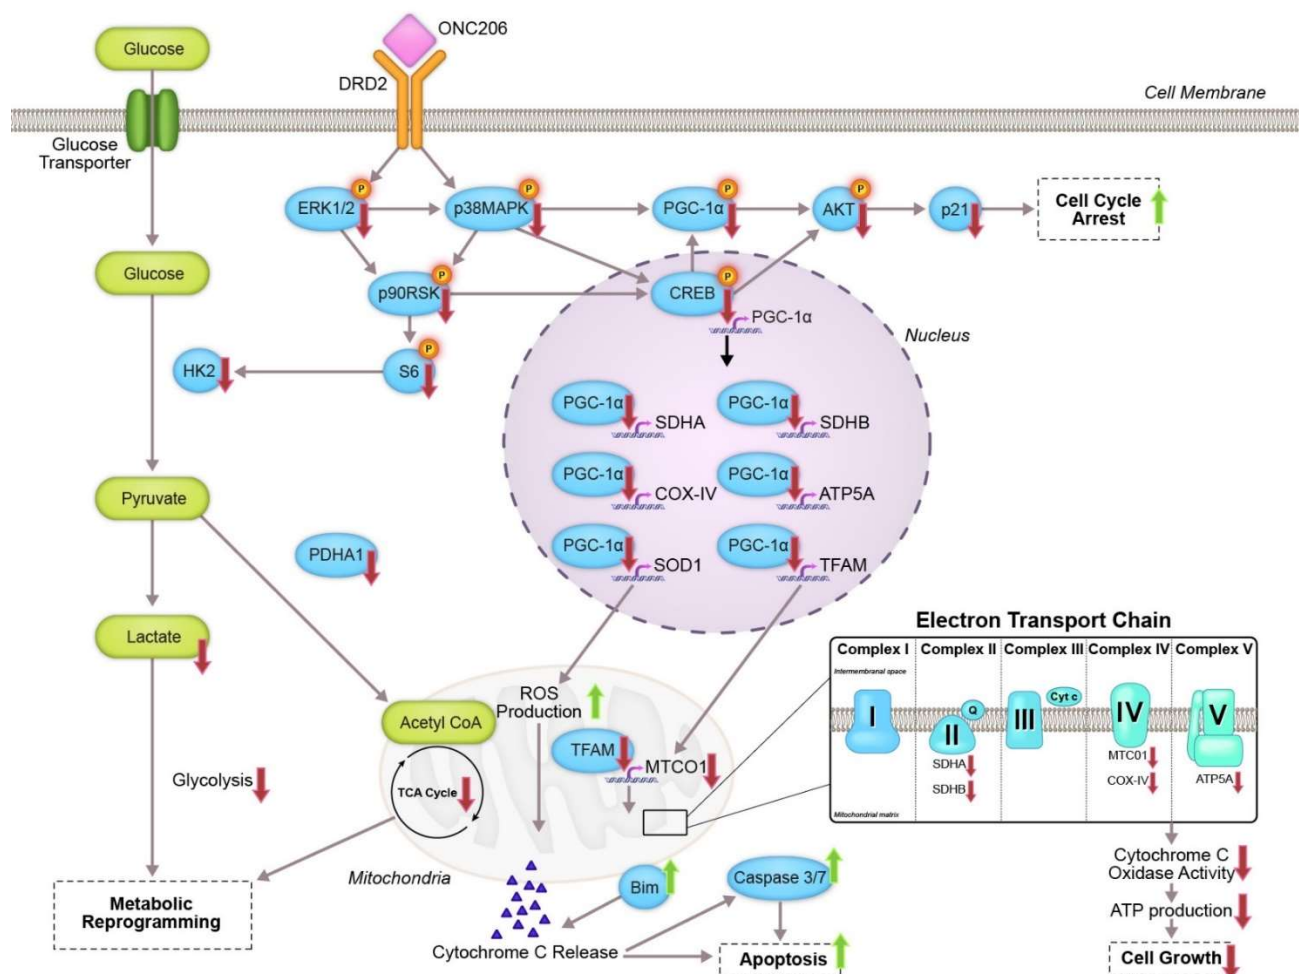

**Figure S5. Schematic summarizing the proposed pathways in which ONC206 is involved in suppressing the malignant phenotype of uterine serous cancer.** ONC206 binds with DRD2 to inactivate the downstream p38MAPK/ERK signaling network that leads to metabolic reprogramming and suppression of mitochondrial protein functions. These subsequently induce apoptosis, and reduce cell growth in uterine serous cancer cells. ROS, reactive oxygen species.

**Table S1. Half-maximal inhibitory concentration (IC50) values for uterine serous cancer cells after treatment with ONC201 or ONC206 for 72 hours**

| Drug   | IC50 (mM) |            |          |
|--------|-----------|------------|----------|
|        | ARK1      | ARK2       | HEC50    |
| ONC201 | 2.9±0.9   | 1.7±0.3    | 1.3±0.5  |
| ONC206 | 0.3±0.03  | 0.16±0.003 | 0.34±0.2 |

**Table S2. Fold change of protein expression in ONC206-treated ARK1 cells, as measured using reverse phase protein array**

| Gene name   | Antibody name      | Fold change (ONC206 treated/untreated) |
|-------------|--------------------|----------------------------------------|
| MT-CO1      | MTCO1              | 0.26228096                             |
| TFAM        | TFAM               | 0.355846774                            |
| MAPK1/MAPK3 | MAPK_pT202_Y204    | 0.417541537                            |
| RPS6KA1     | p90RSK_pT573       | 0.55932949                             |
| SDHB        | Complex-II-Subunit | 0.588202023                            |
| SDHA        | SDHA               | 0.593109831                            |
| TUFM        | TUFM               | 0.603037065                            |
| RPS6        | S6_pS235_S236      | 0.647703155                            |
| RPS6        | S6_pS240_S244      | 0.661827971                            |
| ATP5F1A     | ATP5A              | 0.666325428                            |
| AKT2        | Akt2_pS474         | 0.667513954                            |
| ESRRA       | ERRalpha           | 0.697072142                            |
| CDKN1A      | p21                | 0.702952718                            |
| HK2         | Hexokinase-II      | 0.739747015                            |
| COX4I1      | Cox-IV             | 0.758993242                            |
| SOD1        | SOD1               | 0.808422411                            |
| AKT1/2/3    | Akt_pS473          | 0.820281891                            |
| PDHA1       | PDHA1              | 0.843392938                            |
| AKT1/2/3    | Akt                | 0.849420154                            |
| AKT2        | Akt2               | 0.860281514                            |
| AKT1        | Akt1_pS473         | 0.910276122                            |
| TP53        | p53                | 1.26896059                             |
| BCL2L11     | Bim                | 1.56169375                             |
| CASP7       | Caspase-7-cleaved  | 1.591854094                            |

**Table S3. Primary antibodies used for Western blot analyses**

| <b>Antibody</b>       | <b>Dilution</b> | <b>Company</b>                | <b>Catalog no.</b> |
|-----------------------|-----------------|-------------------------------|--------------------|
| p-ERK1/2 (T202/Y204)  | 1:1000          | Cell Signaling Technology     | 9101               |
| ERK1/2                | 1:1000          | Cell Signaling Technology     | 9102               |
| p-p38MAPK (T180/Y182) | 1:1000          | Cell Signaling Technology     | 4511               |
| p38MAPK               | 1:1000          | Cell Signaling Technology     | 8690               |
| p-S6 (S240/S244)      | 1:1000          | Cell Signaling Technology     | 5367               |
| S6                    | 1:1000          | Cell Signaling Technology     | 2217               |
| PGC-1 $\alpha$        | 1:1000          | Novus Biologicals             | NBP1-04676         |
| TFAM                  | 1:1000          | Cell Signaling Technology     | 7495               |
| SDHA                  | 1:1000          | Cell Signaling Technology     | 11998              |
| MT-CO1                | 1:1000          | Thermo Fisher Scientific      | 459600             |
| COX-IV                | 1:1000          | Cell Signaling Technology     | 4850               |
| SOD1                  | 1:1000          | Cell Signaling Technology     | 4266               |
| HK2                   | 1:1000          | Cell Signaling Technology     | 2867               |
| PDHA1                 | 1:1000          | Cell Signaling Technology     | 3205               |
| p21                   | 1:1000          | Santa Cruz Biotechnology Inc. | sc-397             |
| TRAIL                 | 1:1000          | Cell Signaling Technology     | 3219               |
| Cleaved caspase 3     | 1:1000          | Cell Signaling Technology     | 9661               |
| $\beta$ -actin        | 1:5000          | Sigma-Aldrich Co.             | clone AC-15        |
