# Supplementary figures and images for: Targeting Dopamine Receptor D2 by Imipridone Suppresses Uterine Serous Cancer Malignant Phenotype
Source: MDPI journal article supplement (doi:10.3390/cancers12092436), 2020-08-27

Figure 3b.

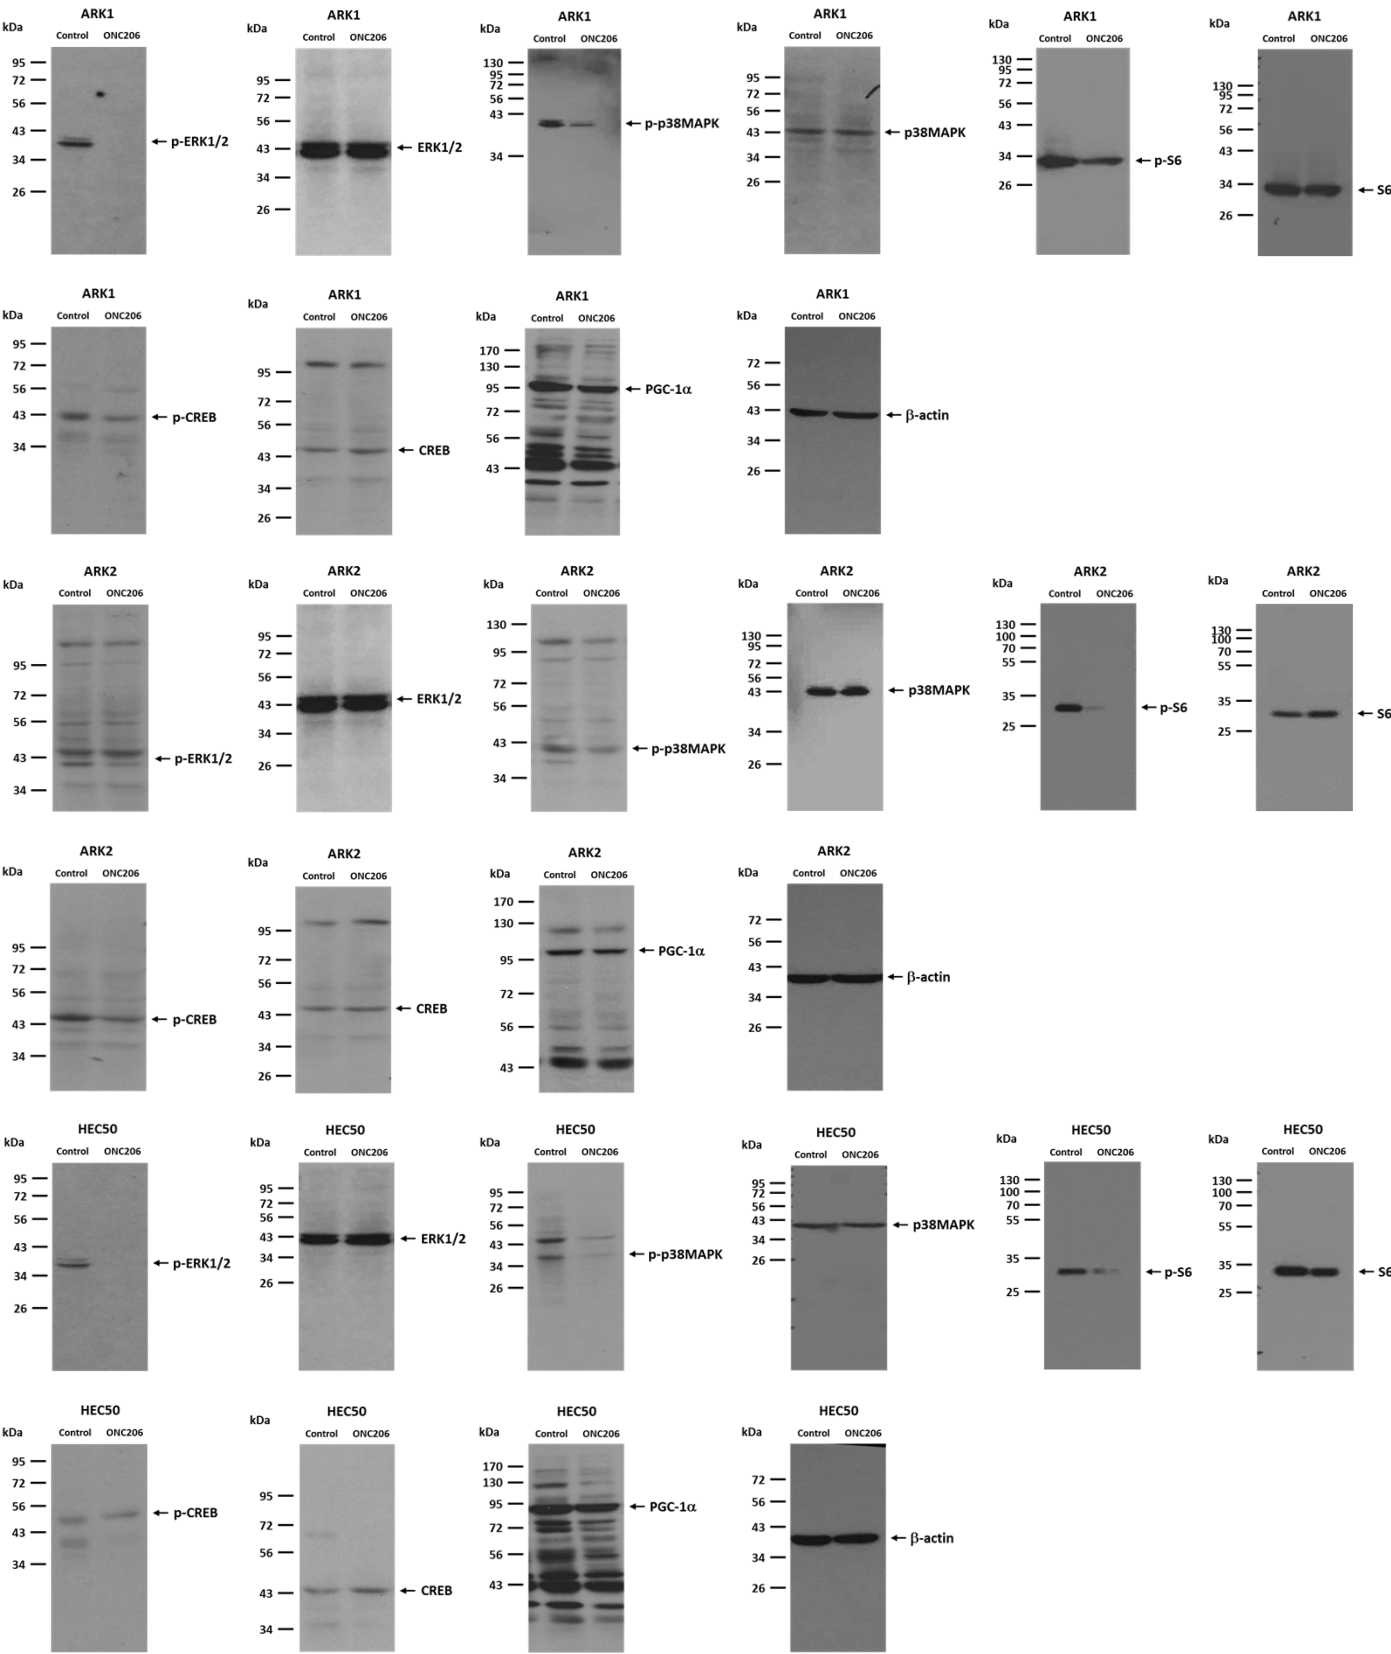

Figure 3c.

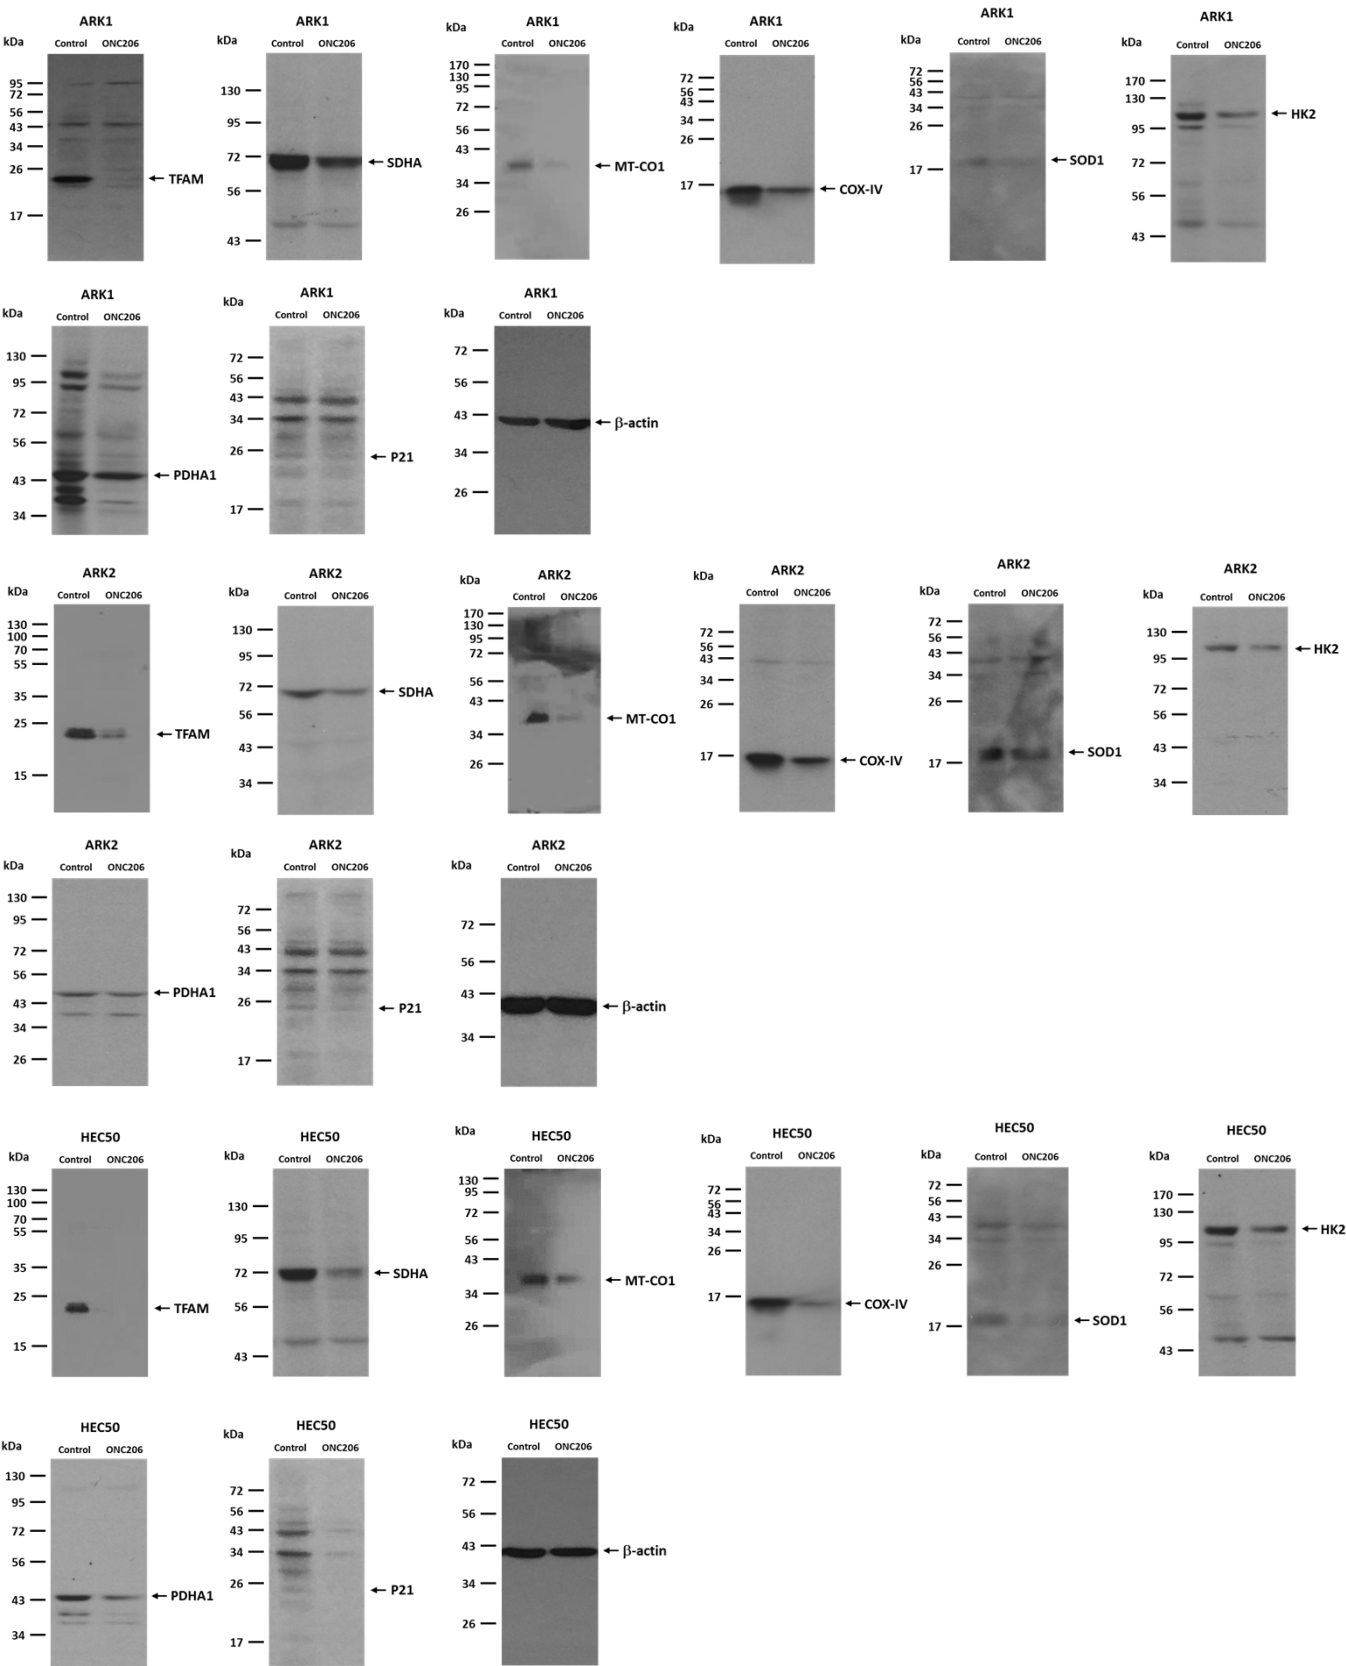

Figure S2b.

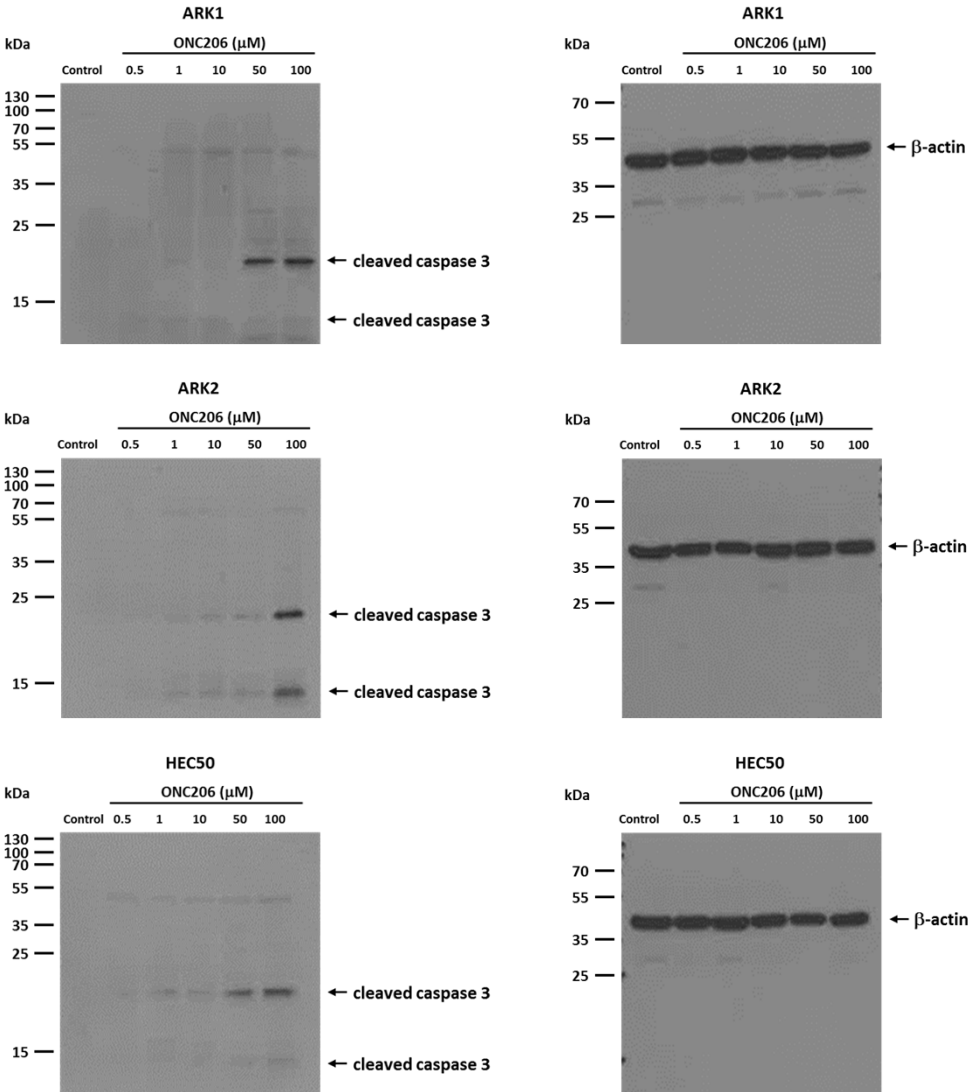

Figure S2c.

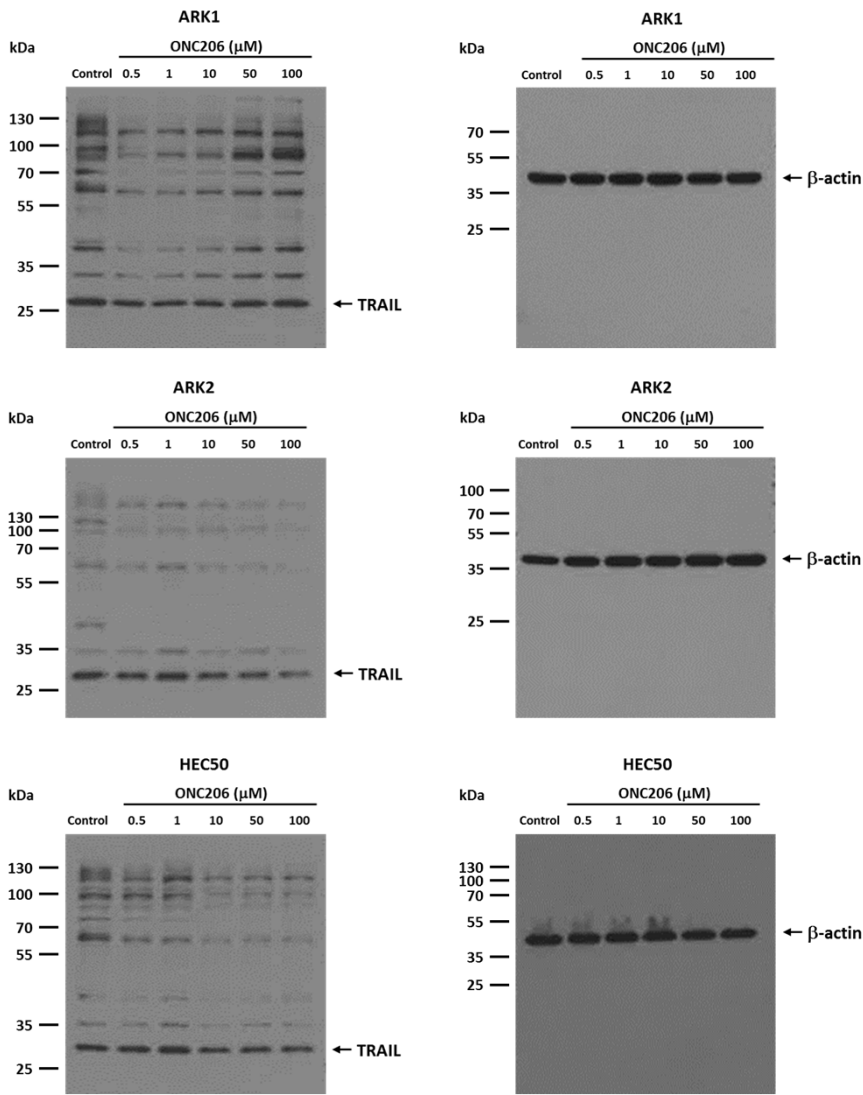

Supplement: s1 [file s1]
